# Supplementary material for: Retrospective correlation analysis of plasma Immunoglobulin G and clinical performance in CIDP
Source: PeerJ. 2019 May 16;7:e6969. doi: 10.7717/peerj.6969 (PMC6526015; doi:10.7717/peerj.6969)
Supplement: Data S1 [file peerj-07-6969-s002.xlsx]

## Sheet: IVIG week 0 vs week 2
		IVIG: change in percent from week 0 to week 2
Study ID	Study	P-IgG	Biodex	Grip strength	9HPT	40MWT	MRC
1	SCIG-placebo	157.971	107.018	111.241	89.2944	83.4225	100.565
2		204.274	112.942	114	74.6835	84.7291	100
6		127.407	121.163	104.594	83.3333	85.4271	100
7		168	90.8588	111.706	97.9358	83.4606	97.4684
10		138.71	94.3768	94.9547	95.2607	87.5706	104.678
11		153.02	183.323	98.2927	91.0811	97.7477	100
15		150.888	119.855	121.068	96.696	84.3537	104.268
16		143.75	116.998	76.9912			98.4733
19		118.421	125.48	100.93	100.462	86.4979	98.8701
22		196.809	93.5228	95.6661	94.4762	103.333	98.8636
23		144.966	102.296	101.613	88.5572	90.0415	100.588
25		145.185	101.717	107.5	100.439	95.6175	98.2249
27		183.099	111.702	100.962	99.7561	84.5494	101.143
29		180.342	117.298	106.501	96.131	92.4419	100.559
3		150.581	127.848	115	93.2504	81.6568	97.5
4		168.75	97.2448	102.684	95.5357	104.453	102.339
5		132.331	102.921	109.038	90.3339	93.7008	101.734
8		157.718	112.857	107.899	95.3191	81.7829	104.192
9		170.175	114.768	116.042	80.9437	96.729	100.568
12		166.929	138.776	117.538	96.3115	86.9301	112.667
13		132.394	91.4798	99.2366	91.2859	92.8994	99.3865
14		148.634	98.9338	108.108	95.5789	83.7905	97.7143
17		228.09	123.68	99.2736	100.469	100	99.4186
20		124.852	121.842	112.609	100.202	100.457	100.575
21		190.517	112.909	115.541	94.402	82.6531	101.775
24		171.304	114.828	134.483	75.8224		111.429
26		137.736	113.357	214.961	95.7944	89.2857	105.59
28		182.143	98.7583	110.924	96.2264	92.0382	99.4382
30		189.394	97.2553	103.929	84.323	84.8101	106.024
1	IVIG-SCIG	144.966	119.563	109.115	96.25	84.7619	100
3		105.525	95.0311	144.167			101.626
6		171.905	96.0174	94.3662	102.222	100	102.469
7		137.419	113.134	99.581	88.3117	95.4545	101.124
8		133.333	73.9414	81.7469	105.645	104.839	99.4382
11		162.827	109.009	98.1233	89.6552	97.8261	103.106
13		161.392	126.846	106.25	109.677	91.3043	97.7011
15		107.614	96.315	89.4942	118.584	100	101.205
17		118.11	93.5802	99.1432	92.3077	100	97.7778
21		165.306	94.2144	109.792	93.5484	96.0784	101.796
24		120.833	108.813	104.594	91.2088	91.6667	100.571
20		106.691	89.4831	95.6938	94.7761	106.45	100.565
35		154.11	95.1116	93.8416	92.5532	98.0769	100
2		189.63	103.875	108.556	54.7368	83.3333	111.644
4		107.386	91.8086	104.615	82.7586	97.9592	106.289
5		102.74	84.1746	85.2941	109.412	122.951	96.7949
27		148.276	108.075	189.048	65.2344	86.2069	110.559
2	De novo	174.219	104.229	98.3949	87.9518	98.7288	98.8701
4		223.469	99.388	102.778	99.5025	100.98	101.744
5		214.286	121.246	119.6	92.9752	98.3146	106.707
6		176.923	103.072	96.904	101.887	99.5349	101.734
11		230.612	96.337	113.35	100	100	101.176
12		164.085	157.042	433.333			109.023
13		202.222	103.989	105.711	97.6608	90.625	101.124
14		127.419	93.9461	83.3333	91.6667	103.571	98.7342
20		220.87	106.265	89.1837	91.1579	88.125	100

## Sheet: SCIG week 0 vs week 10-12
		SCIG: change in percent from week 0 to week 10/12
StudyID		Plasma IgG	Biodex	Grip strength	9-HPT	40-MWT	MRC
1	SCIG-placebo	89.45	86.44	94.7368	108.174	94.8718	101.124
2		51.46	85	92.2027	106.102	102.326	95
6		81.98	100.1	105.417	97.3684	83.5294	102.286
7		81.63	98.08	93.7126	94.6136	90.5488	111.688
10		115.12	98.36	113.488	102.488	89.6774	100
15		95.29	93.11	86.3971	94.533	93.9516	100.585
16		131.88	94.27	126.437			94.5736
22		66.49	96.91	100.671	96.1694	107.258	97.7011
23		68.98	111.62	128.095	102.809	95.8525	104.094
25		65.82	103.61	107.171	94.3231	107.5	103.012
27		74.23	102.17	101.587	91.9315	95.9391	98.3051
29		94.79	102.32	94.8052	96.2848	91.195	100
1	IVIG-SCIG	91.9	106.65	118.274	87.8049	91.8919	107.792
3		98.34	94.51	152.033			100.826
6		92.93	96.79	92.5722	86.1702	104.762	95.8084
7		84.91	101.52	100.125	110.484	105.128	102.299
8		81.86	103.72	94.1029	102.804	94.4444	99.4382
9		71.86	101.61	96.957	100	93.6508	100
10		99.22	85.9	59.1398		107.353	101.342
11		94.42	93.66	98.4444	86.747	93.1818	105.389
13		67.72	88.34	105.66	92.7835	101.667	98.8571
15		100.47	101.93	100	100.917	100.833	109.202
17		103.95	89.19	82.3377	110.989	95.6522	98.8764
21		83.54	78.82	83.1832	101.22	103.774	102.312
24		83.26	95.09	99.7178	100	100	100.565
20		101.08	100.91	81.9565	87.069	109.38	99.4444
131	SCIG-SCIG	88.66	98.42	102.162	94.3925	100	102.924
133		94.41	105.51	100	109.783		97.6879
134		106.6	75.45	105.263	104.348	96.9697	99.4253
136		108.81	95.67	103.257	100	98.1818	97.5723
137		93.02	86.3	147.664	91.0112	101.923	100.61
140		110.44	86.84	97.6056	94.7368	115.909	97.1591
141		104.44	77.16	103.286	110.667	106.383	102.353
142		100	94.57	79.8839	102.424	108.989	100
144		94.25	113.17	95.6	103.96	93.1034	102.381
8	SCIG-followup	122.78	106.07	93.97	101.75	96.76	100.57
11		102.67	97.73	98.69	94.2	100.88	99.44
14		86.83	93.59	96.16	91.35	109.49	98.32
24		105.42	99.47	78.95			102.61
26		113.14	109.85	141.01	106.78	97.2	100.57
28		90.73	106.09	111.82	97.22	96.06	98.89
